# Supplementary material for: Novel Common Variants Associated with Obesity and Type 2 Diabetes Detected Using a cFDR Method
Source: PubMed Central journal article supplement (PMC5703959; doi:10.1038/s41598-017-16722-6), 2017-11-27
Supplement: 41598_2017_16722_MOESM1_ESM.pdf [file 41598_2017_16722_MOESM1_ESM.pdf]

## Novel Common Variants Associated with Obesity and Type 2 Diabetes Detected Using a cFDR Method

Qiang Zhang<sup>1</sup>, Ke-Hao Wu<sup>2</sup>, Jing-Yang He<sup>1</sup>, Yong Zeng<sup>2,4</sup>, Jonathan Greenbaum<sup>2</sup>, Xin Xia<sup>1</sup>, Hui-Min Liu<sup>1</sup>, Wan-Qiang Lv<sup>1</sup>, Xu Lin<sup>3</sup>, Wei-Dong Zhang<sup>1</sup>, Yuan-Lin Xi<sup>1</sup>, Xue-Zhong Shi<sup>1</sup>, Chang-Qing Sun<sup>1\*</sup>, Hong-Wen Deng<sup>1,2\*</sup>

<sup>1</sup>College of Public Health, Zhengzhou University, Zhengzhou, NO.100 Kexue Road, High-Tech Development Zone Of States, P.R.C

<sup>2</sup>Center for Bioinformatics and Genomics, School of Public Health and Tropical Medicine, Tulane University, New Orleans, LA 70112, USA

<sup>3</sup>Department of Endocrinology and Metabolism, the Third Affiliated Hospital of Southern Medical University, Guang Zhou, P.R.C

<sup>4</sup>College of Sciences, Beijing Jiao Tong University, Beijing, China

### **\*Corresponding author**

Chang-Qing Sun, Prof.

Department of Social Medicine and Health Management

College of Public Health, Zhengzhou University 100 Kexue Avenue

Zhengzhou, 450001, Henan, PR China

Phone: +86 371 67781926

Fax: +86 371 67781919

E-mail: [suncq@zzu.edu.cn](mailto:suncq@zzu.edu.cn)

Hong-Wen Deng, Prof.

Department of Epidemiology and Biostatistics

College of Public Health, Zhengzhou University 100 Kexue Avenue

Zhengzhou, 450001, Henan, PR China

Tulane Center of Bioinformatics and Genomics

Department of Biostatistics and Data Science

Tulane University School of Public Health and Tropical Medicine

New Orleans, LA 70112, USA

Email: [hdeng2@tulane.edu](mailto:hdeng2@tulane.edu)

## Supplemental Information

**Table S1.** Overlapped individuals between BMI and T2D in European descendants.

**Table S2.** Conditional FDR value for BMI given the T2D ( $cFDR < 0.05$ ).

**Table S3.** SNPs in high LD ( $R^2 > 0.6$ ) with BMI-associated loci

**Table S4.** Conditional FDR value for T2D given the BMI ( $cFDR < 0.05$ ).

**Table S5.** SNPs in high LD ( $R^2 > 0.6$ ) with T2D-associated loci

**Figure S1. Stratified QQ plots.** Upper Panel: Stratified QQ plots of nominal versus empirical  $-\log_{10}$  p-values in (left) BMI as a function of significance of the association with ADHD, and in (right) ADHD as a function of significance of the association with BMI. Lower Panel: Stratified QQ plots of nominal versus empirical  $-\log_{10}$  p-values in (left) BMI as a function of significance of the association with MDD, and in (right) MDD as a function of significance of the association with BMI.

**Figure S2. Stratified QQ plots.** Upper Panel: Stratified QQ plots of nominal versus empirical  $-\log_{10}$  p-values in (left) T2D as a function of significance of the association with ADHD, and in (right) ADHD as a function of significance of the association with T2D. Lower Panel: Stratified QQ plots of nominal versus empirical  $-\log_{10}$  p-values in (left) T2D as a function of significance of the association with MDD, and in (right) MDD as a function of significance of the association with T2D.

**Figure S3.** Protein-protein interactions between BMI-associated genes.

**Figure S4.** Protein-protein interactions between T2D-associated genes.

**Table S1: Overlapped individuals between T2D and BMI in European descendants**

| <b>study</b>     | <b>Full Name</b>                                                                                                                    | <b>T2D</b>                  | <b>BMI</b>                 |
|------------------|-------------------------------------------------------------------------------------------------------------------------------------|-----------------------------|----------------------------|
| <b>ARIC</b>      | Atherosclerosis Risk in Communities Study                                                                                           | cases,775;controls,7,159    | 8,108                      |
| <b>deCODE</b>    | deCODE genetics sample set                                                                                                          | cases,1,465;controls,23,194 | 26,799                     |
| <b>PROMIS</b>    | Pakistan Risk of Myocardial Infarction Study                                                                                        | cases,2,361;controls,6,817  | 3,615                      |
| <b>DGI</b>       | Diabetes Genetics Initiative of Broad Institute of Harvard and MIT, Lund University, and Novartis Institutes of BioMedical Research | cases,1,022;controls,1,075  | cases,1,317;controls,1,088 |
| <b>FUSION</b>    | Finland-United States Investigation of NIDDM Genetics                                                                               | cases,1,161;controls,1,174  | cases,1,092;controls,1,171 |
| <b>NHS</b>       | The Nurses' Health Study                                                                                                            | cases,1,467;controls,1,754  | 2,265                      |
| <b>T2D_WTCCC</b> | WTCCC Type 2 Diabetes cases                                                                                                         | cases,1,924                 | cases,1,903                |

**Table S2 Conditional FDR value for BMI given the T2D (cFDR < 0.05).**

| <b>RSID</b>       | <b>ROLE</b> | <b>GENE</b>             | <b>CHR</b> | <b>SNP type</b> | <b>Gene type</b>     | <b>P.valueA</b> | <b>cFDR.AcB</b> |
|-------------------|-------------|-------------------------|------------|-----------------|----------------------|-----------------|-----------------|
| <b>rs9930506</b>  | intronic    | FTO                     | chr16      | Confirmed       | Confirmed            | 2.52E-124       | 1.01E-123       |
| <b>rs7531118</b>  | intergenic  | NEGR1,<br>LINC01360     | chr1       | Confirmed       | Confirmed            | 1.88E-28        | 5.07E-24        |
| <b>rs1996023</b>  | intergenic  | GNPDA2,<br>GABRG1       | chr4       | Confirmed       | Confirmed, confirmed | 1.11E-20        | 1.93E-17        |
| <b>rs11672660</b> | intronic    | GIPR                    | chr19      | Confirmed       | Confirmed            | 7.91E-19        | 4.31E-15        |
| <b>rs7141420</b>  | intronic    | NRXN3                   | chr14      | Confirmed       | Confirmed            | 8.66E-15        | 4.68E-13        |
| <b>rs1385912</b>  | intronic    | NEGR1                   | chr1       | Confirmed       | Confirmed            | 5.79E-17        | 7.00E-13        |
| <b>rs1031477</b>  | intronic    | NCKAP5L                 | chr12      | Confirmed       | Confirmed            | 4.87E-16        | 7.59E-13        |
| <b>rs2635727</b>  | intergenic  | TFAP2B,<br>PKHD1        | chr6       | Confirmed       | Confirmed, confirmed | 1.35E-15        | 1.25E-11        |
| <b>rs1849338</b>  | intergenic  | GNPDA2,<br>GABRG1       | chr4       | Confirmed       | Confirmed, confirmed | 5.09E-14        | 4.70E-11        |
| <b>rs7553348</b>  | intronic    | FPGT-TNNI3K,<br>TNNI3K  | chr1       | Confirmed       | Confirmed, confirmed | 4.40E-15        | 5.56E-11        |
| <b>rs2902210</b>  | intronic    | SEC16B                  | chr1       | Confirmed       | Confirmed            | 3.37E-14        | 2.10E-10        |
| <b>rs12429545</b> | intergenic  | LINC01065,<br>LINC00558 | chr13      | Confirmed       | Confirmed, confirmed | 3.15E-13        | 2.90E-10        |
| <b>rs12956917</b> | intergenic  | PMAIP1,<br>MC4R         | chr18      | Confirmed       | Confirmed, confirmed | 2.09E-13        | 1.73E-09        |
| <b>rs3922668</b>  | intronic    | SPNS1                   | chr16      | Confirmed       | Confirmed            | 7.95E-13        | 7.08E-09        |

|                   |                |                            |       |                                                   |                      |          |          |
|-------------------|----------------|----------------------------|-------|---------------------------------------------------|----------------------|----------|----------|
| <b>rs11125884</b> | ncRNA_intronic | DNAJC27-AS1                | chr2  | Confirmed                                         | Confirmed            | 1.74E-12 | 8.98E-09 |
| <b>rs7939420</b>  | intronic       | AGBL2                      | chr11 | Confirmed                                         | Confirmed            | 2.22E-12 | 9.91E-09 |
| <b>rs2060604</b>  | intergenic     | HNF4G,<br>LINC01111        | chr8  | Confirmed                                         | Confirmed, confirmed | 9.46E-12 | 4.12E-08 |
| <b>rs6548242</b>  | intergenic     | FAM150B,<br>TMEM18         | chr2  | Confirmed                                         | Confirmed, confirmed | 6.14E-11 | 9.28E-08 |
| <b>rs752720</b>   | intergenic     | PMAIP1,<br>MC4R            | chr18 | Confirmed                                         | Confirmed, confirmed | 6.63E-11 | 9.81E-08 |
| <b>rs10787472</b> | intronic       | TCF7L2                     | chr10 | T2D (26551672)                                    | Confirmed            | 3.25E-07 | 3.25E-07 |
| <b>rs4704220</b>  | intronic       | COL4A3BP                   | chr5  | LDL (20686565)                                    | Confirmed            | 4.90E-10 | 8.96E-07 |
| <b>rs9540493</b>  | intergenic     | LOC102723968,<br>LINC01052 | chr13 | Confirmed                                         | Confirmed, confirmed | 3.95E-09 | 1.22E-06 |
| <b>rs16945088</b> | intronic       | FTO                        | chr16 | Confirmed                                         | Confirmed            | 5.30E-09 | 1.48E-06 |
| <b>rs6658131</b>  | intergenic     | LOC101928241,<br>PTBP2     | chr1  | Confirmed                                         | Confirmed, confirmed | 1.97E-09 | 1.52E-06 |
| <b>rs1032524</b>  | ncRNA_intronic | IPO9-AS1                   | chr1  | Confirmed                                         | Confirmed            | 5.64E-10 | 2.01E-06 |
| <b>rs4238585</b>  | intergenic     | GPR139, GP2                | chr16 | Confirmed                                         | Confirmed, confirmed | 1.12E-08 | 3.02E-06 |
| <b>rs2881654</b>  | intronic       | PPARG                      | chr3  | Fasting insulin<br>adjusted for BMI<br>(22885924) | Confirmed            | 1.40E-06 | 4.19E-06 |
| <b>rs522367</b>   | intronic       | SEC16B                     | chr1  | Confirmed                                         | Confirmed            | 1.97E-09 | 5.82E-06 |
| <b>rs815611</b>   | intergenic     | MFAP3,<br>GALNT10          | chr5  | Confirmed                                         | Confirmed, confirmed | 2.36E-08 | 8.50E-06 |
| <b>rs6713510</b>  | ncRNA_intronic | LOC646736                  | chr2  | Confirmed                                         | Confirmed            | 1.97E-08 | 8.62E-06 |
| <b>rs2038645</b>  | intergenic     | LOC101928241,              | chr1  | Confirmed                                         | Novel, confirmed     | 1.01E-08 | 9.37E-06 |

|            |                |                               |       |                                     |                      |          |             |
|------------|----------------|-------------------------------|-------|-------------------------------------|----------------------|----------|-------------|
|            |                | PTBP2                         |       |                                     |                      |          |             |
| rs17217144 | intronic       | FTO                           | chr16 | Confirmed                           | Confirmed            | 4.10E-08 | 9.96E-06    |
| rs12986742 | ncRNA_intronic | LINC01122                     | chr2  | Confirmed                           | Confirmed            | 8.92E-09 | 1.13E-05    |
| rs9958194  | intergenic     | PMAIP1,<br>MC4R               | chr18 | Confirmed                           | Confirmed, confirmed | 3.02E-08 | 1.15E-05    |
| rs1275986  | intergenic     | CIB4, KCNK3                   | chr2  | Confirmed                           | Novel, confirmed     | 4.88E-08 | 1.28E-05    |
| rs1780050  | intronic       | NEXN                          | chr1  | Confirmed                           | Confirmed            | 2.71E-08 | 2.01E-05    |
| rs11755393 | exonic         | UHRF1BP1                      | chr6  | Confirmed                           | Confirmed            | 2.43E-08 | 2.42E-05    |
| rs891386   | intronic       | C18orf8                       | chr18 | Confirmed                           | Confirmed            | 5.20E-08 | 2.90E-05    |
| rs16952522 | intronic       | FTO                           | chr16 | Confirmed                           | Confirmed            | 8.47E-08 | 2.94E-05    |
| rs849135   | intronic       | JAZF1                         | chr7  | Height (23754948)                   | Confirmed            | 1.45E-05 | 3.85E-05    |
| rs2235569  | intronic       | C6orf106                      | chr6  | <b>LD</b>                           | Confirmed            | 9.64E-08 | 6.26E-05    |
| rs757318   | intronic       | CRTC1                         | chr19 | Confirmed                           | Confirmed            | 3.18E-08 | 6.46E-05    |
| rs17243334 | intronic       | MAP2K5                        | chr15 | <b>LD</b>                           | Confirmed            | 3.09E-07 | 9.45E-05    |
| rs6990042  | intronic       | SGCZ                          | chr8  | Novel                               | Confirmed            | 4.48E-07 | 0.000165225 |
| rs7503807  | intronic       | RPTOR                         | chr17 | <b>LD</b>                           | Confirmed            | 5.73E-07 | 0.00017371  |
| rs185350   | downstream     | KCTD15                        | chr19 | BMI (23754948)                      | Confirmed            | 7.63E-08 | 0.000248708 |
| rs4949662  | intronic       | ZZZ3                          | chr1  | <b>LD</b>                           | Obesity (23563607)   | 4.98E-07 | 0.000278265 |
| rs1222069  | intergenic     | LOC102723661,<br>LOC101928241 | chr1  | Confirmed                           | Confirmed, novel     | 1.64E-06 | 0.000282799 |
| rs7197983  | intronic       | FTO                           | chr16 | Novel                               | Confirmed            | 2.05E-07 | 0.000292654 |
| rs2335418  | intergenic     | ANKRD31,<br>HMGCR             | chr5  | LDL/total cholesterol<br>(20686565) | Confirmed, confirmed | 6.88E-07 | 0.000303523 |
| rs17584208 | intergenic     | PSRC1,<br>MYBPHL              | chr1  | LDL/total cholesterol<br>(20686565) | Confirmed, novel     | 4.58E-06 | 0.000306011 |



|                   |                |                         |       |                                                   |                      |           |             |
|-------------------|----------------|-------------------------|-------|---------------------------------------------------|----------------------|-----------|-------------|
| <b>rs258496</b>   | intergenic     | POC5, SV2C              | chr5  | LDL/total cholesterol<br>(24097068)               | Confirmed, novel     | 4.88E-07  | 0.000357566 |
| <b>rs6720683</b>  | intergenic     | FAM150B,<br>TMEM18      | chr2  | Novel                                             | Novel, confirmed     | 2.33E-07  | 0.000368699 |
| <b>rs1440983</b>  | intergenic     | PRKD1, G2E3             | chr14 | BMI (23754948)                                    | Confirmed, novel     | 3.56E-06  | 0.000374722 |
| <b>rs11079813</b> | intronic       | SKAP1                   | chr17 | Novel                                             | Confirmed            | 2.95E-06  | 0.000376817 |
| <b>rs4481184</b>  | intronic       | IGF2BP2                 | chr3  | T2D (24509480)                                    | Confirmed            | 0.0002524 | 0.0003786   |
| <b>rs11632574</b> | intronic       | MAP2K5                  | chr15 | <b>LD</b>                                         | Confirmed            | 1.67E-06  | 0.000414023 |
| <b>rs10840103</b> | intergenic     | TRIM66,<br>RPL27A       | chr11 | <b>LD</b>                                         | Confirmed, confirmed | 1.74E-07  | 0.000427491 |
| <b>rs7239883</b>  | ncRNA_intronic | LINC00907               | chr18 | Confirmed                                         | Confirmed            | 3.14E-07  | 0.000435037 |
| <b>rs12454712</b> | intronic       | BCL2                    | chr18 | Waist hip ratio<br>adjusted for BMI<br>(25673412) | Confirmed            | 6.04E-06  | 0.000495526 |
| <b>rs6795735</b>  | ncRNA_intronic | ADAMTS9-AS<br>2         | chr3  | Waist hip ratio<br>adjusted for BMI<br>(25673412) | Confirmed            | 2.92E-05  | 0.00055499  |
| <b>rs11688816</b> | intronic       | EHBP1                   | chr2  | Confirmed                                         | Confirmed            | 3.80E-07  | 0.000573136 |
| <b>rs1861569</b>  | intergenic     | MIR5095,<br>CBLN1       | chr16 | <b>LD</b>                                         | Novel, confirmed     | 5.67E-06  | 0.000575201 |
| <b>rs6864049</b>  | intergenic     | ZNF608,<br>LOC101927421 | chr5  | Waist circumference<br>(25673412)                 | Confirmed, confirmed | 2.12E-07  | 0.000624587 |
| <b>rs17110049</b> | intergenic     | STXBP6,<br>NOVA1        | chr14 | Novel                                             | Confirmed, confirmed | 3.16E-07  | 0.00062492  |
| <b>rs405509</b>   | upstream       | APOE                    | chr19 | LDL cholesterol                                   | Confirmed            | 2.65E-07  | 0.00067586  |

|                   |            |                         |       |                                 |                                            |          |             |  |
|-------------------|------------|-------------------------|-------|---------------------------------|--------------------------------------------|----------|-------------|--|
|                   |            |                         |       | (20686565)                      |                                            |          |             |  |
| <b>rs2270204</b>  | intronic   | SWI5                    | chr9  | Novel                           | Confirmed                                  | 3.22E-07 | 0.000726505 |  |
| <b>rs740158</b>   | intergenic | LOC101927243,<br>PTPN12 | chr7  | Novel                           | Novel, novel                               | 3.98E-06 | 0.000738203 |  |
| <b>rs1549979</b>  | intronic   | CADM2                   | chr3  | <b>LD</b>                       | Confirmed                                  | 2.71E-07 | 0.000749461 |  |
| <b>rs1979755</b>  | intronic   | KCNG3                   | chr2  | Novel                           | Confirmed                                  | 4.33E-07 | 0.000950734 |  |
| <b>rs4807191</b>  | intronic   | BTBD2                   | chr19 | Novel                           | Novel                                      | 7.47E-07 | 0.000955929 |  |
| <b>rs9784046</b>  | intergenic | FAM150B,<br>TMEM18      | chr2  | <b>LD</b>                       | Novel, confirmed                           | 4.76E-07 | 0.000983564 |  |
| <b>rs10499694</b> | intronic   | DDC                     | chr7  | Novel                           | Confirmed                                  | 4.72E-07 | 0.000987047 |  |
| <b>rs1546924</b>  | intronic   | FAM212B                 | chr1  | Novel                           | Confirmed                                  | 4.93E-06 | 0.000989891 |  |
| <b>rs1561277</b>  | intronic   | ZRANB3                  | chr2  | Height (25282103)               | Height (25282103)                          | 7.85E-07 | 0.001078547 |  |
| <b>rs7433760</b>  | intronic   | ETV5                    | chr3  | Novel                           | Confirmed                                  | 1.02E-06 | 0.001090877 |  |
| <b>rs12681744</b> | intergenic | HNF4G,<br>LINC01111     | chr8  | Novel                           | Confirmed, hip circumference<br>(25673412) | 1.01E-06 | 0.001127745 |  |
| <b>rs7633265</b>  | intronic   | ACAP2                   | chr3  | Novel                           | Confirmed                                  | 6.62E-07 | 0.001299579 |  |
| <b>rs13432055</b> | intronic   | CCDC85A                 | chr2  | Novel                           | Novel                                      | 1.14E-05 | 0.001313946 |  |
| <b>rs998584</b>   | intergenic | , LINC01512             | chr6  | Waist hip ratio<br>(25673412)   | Confirmed, novel                           | 2.89E-06 | 0.001315945 |  |
| <b>rs227761</b>   | intronic   | IQCK                    | chr16 | Novel                           | Confirmed                                  | 3.81E-06 | 0.001455138 |  |
| <b>rs4290163</b>  | intergenic | CYP17A1,<br>BORCS7      | chr10 | Hip circumference<br>(25673412) | Novel, novel                               | 7.35E-07 | 0.00151012  |  |
| <b>rs12895330</b> | intergenic | AKAP6, NPAS3            | chr14 | Novel                           | Confirmed, confirmed                       | 9.72E-05 | 0.00160413  |  |
| <b>rs9381901</b>  | intergenic | TFAP2D,<br>TFAP2B       | chr6  | <b>LD</b>                       | Confirmed, confirmed                       | 1.77E-06 | 0.001629138 |  |

|                   |            |                        |       |                                 |                      |          |             |
|-------------------|------------|------------------------|-------|---------------------------------|----------------------|----------|-------------|
| <b>rs12044597</b> | intronic   | NADK                   | chr1  | Novel                           | Novel                | 1.01E-06 | 0.001646721 |
| <b>rs9408902</b>  | intergenic | ASTN2,<br>LOC101928797 | chr9  | <b>LD</b>                       | Novel, confirmed     | 3.06E-06 | 0.001713757 |
| <b>rs3930017</b>  | intergenic | PMS2P9,<br>CCDC146     | chr7  | Novel                           | Novel, novel         | 9.35E-07 | 0.001744005 |
| <b>rs4937993</b>  | intronic   | NCAM1                  | chr11 | Novel                           | Confirmed            | 4.70E-06 | 0.001846511 |
| <b>rs2444217</b>  | intronic   | ADCY9                  | chr16 | Novel                           | Confirmed            | 1.92E-06 | 0.001940733 |
| <b>rs6730157</b>  | intronic   | RAB3GAP1               | chr2  | Height (25282103)               | Confirmed            | 2.04E-06 | 0.002005948 |
| <b>rs12127789</b> | intronic   | NEGR1                  | chr1  | <b>LD</b>                       | Confirmed            | 1.54E-05 | 0.00203588  |
| <b>rs7232886</b>  | intergenic | PMAIP1,<br>MC4R        | chr18 | <b>LD</b>                       | Confirmed, confirmed | 1.53E-06 | 0.002068537 |
| <b>rs4988235</b>  | intronic   | MCM6                   | chr2  | Hip circumference<br>(25673412) | Confirmed            | 2.14E-06 | 0.002069618 |
| <b>rs7551794</b>  | intergenic | PTBP2, DPYD            | chr1  | Novel                           | Confirmed, confirmed | 3.81E-06 | 0.002080004 |
| <b>rs12447481</b> | intronic   | FTO                    | chr16 | Novel                           | Confirmed            | 1.30E-05 | 0.002233689 |
| <b>rs6465468</b>  | UTR3       | ASB4                   | chr7  | Confirmed                       | Confirmed            | 2.44E-06 | 0.00240137  |
| <b>rs4809401</b>  | exonic     | NPBWR2                 | chr20 | Novel                           | Confirmed            | 7.51E-06 | 0.002417407 |
| <b>rs4771946</b>  | intronic   | HS6ST3                 | chr13 | <b>LD</b>                       | Confirmed            | 2.57E-06 | 0.00256469  |
| <b>rs751008</b>   | intronic   | DOCK1                  | chr10 | Novel                           | Confirmed            | 1.64E-06 | 0.002861018 |
| <b>rs2685230</b>  | intergenic | FAM150B,<br>TMEM18     | chr2  | Novel                           | Novel, confirmed     | 4.88E-06 | 0.00286647  |
| <b>rs4304326</b>  | intergenic | DUSP26,<br>LINC01288   | chr8  | Novel                           | Confirmed, confirmed | 9.32E-06 | 0.002929285 |
| <b>rs2074120</b>  | intronic   | CALCR                  | chr7  | Novel                           | Confirmed            | 8.81E-06 | 0.002932137 |
| <b>rs4667682</b>  | intergenic | TLK1,                  | chr2  | Novel                           | Novel, confirmed     | 3.43E-06 | 0.0030852   |

|                   |                |                   |       |                             |                      |          |             |
|-------------------|----------------|-------------------|-------|-----------------------------|----------------------|----------|-------------|
|                   |                | METTL8            |       |                             |                      |          |             |
| <b>rs9659092</b>  | intronic       | AGBL4             | chr1  | <b>LD</b>                   | Confirmed            | 1.86E-06 | 0.003136918 |
| <b>rs7748777</b>  | intergenic     | TREM2,<br>TREML2  | chr6  | Novel                       | Novel, novel         | 1.27E-05 | 0.003178313 |
| <b>rs7228347</b>  | intergenic     | MC4R, CDH20       | chr18 | <b>LD</b>                   | Confirmed, novel     | 9.41E-06 | 0.003254209 |
| <b>rs10971712</b> | intronic       | UBE2R2            | chr9  | Novel                       | Confirmed            | 1.51E-05 | 0.003293576 |
| <b>rs12598706</b> | intronic       | PDILT             | chr16 | Novel                       | Novel                | 4.34E-06 | 0.003310199 |
| <b>rs17700028</b> | intergenic     | PMAIP1,<br>MC4R   | chr18 | Novel                       | Confirmed, confirmed | 2.63E-05 | 0.003315913 |
| <b>rs2665357</b>  | intronic       | SLC22A3           | chr6  | Triglycerides<br>(24097068) | Confirmed            | 2.17E-05 | 0.003381668 |
| <b>rs10850838</b> | intergenic     | MIR4497,<br>GLTP  | chr12 | Novel                       | Novel, novel         | 2.49E-05 | 0.003760116 |
| <b>rs11786541</b> | intergenic     | MIR124-1,<br>MSRA | chr8  | Novel                       | Novel, novel         | 6.20E-05 | 0.003802053 |
| <b>rs1225051</b>  | intronic       | CPNE4             | chr3  | Novel                       | Novel                | 5.23E-06 | 0.003898182 |
| <b>rs1433075</b>  | intronic       | ZNF536            | chr19 | Novel                       | Confirmed            | 1.53E-05 | 0.00418506  |
| <b>rs17594321</b> | intronic       | ICA1L             | chr2  | Novel                       | Novel                | 4.10E-05 | 0.00433728  |
| <b>rs2150855</b>  | intronic       | LINGO2            | chr9  | Novel                       | Confirmed            | 3.52E-06 | 0.004399431 |
| <b>rs10934987</b> | intronic       | CPNE4             | chr3  | Novel                       | Confirmed            | 5.03E-05 | 0.004563173 |
| <b>rs17049738</b> | ncRNA_intronic | LINC01122         | chr2  | Novel                       | Confirmed            | 4.36E-05 | 0.004600947 |
| <b>rs9357506</b>  | intronic       | RCAN2             | chr6  | Novel                       | Confirmed            | 6.80E-06 | 0.004685473 |
| <b>rs17326595</b> | intergenic     | KCTD15,<br>LSM14A | chr19 | <b>LD</b>                   | Confirmed, novel     | 3.44E-06 | 0.004839931 |
| <b>rs7586043</b>  | intergenic     | LINC01320,        | chr2  | Novel                       | Novel, confirmed     | 3.94E-05 | 0.005117885 |

| LOC100288911 |                |                         |       |                              |                              |           |             |
|--------------|----------------|-------------------------|-------|------------------------------|------------------------------|-----------|-------------|
| rs2280018    | intronic       | PDXDC1                  | chr16 | Novel                        | Confirmed                    | 4.70E-05  | 0.005435586 |
| rs9639027    | upstream       | ZNF12                   | chr7  | Novel                        | Confirmed                    | 4.50E-06  | 0.005515095 |
| rs10069222   | intronic       | SLIT3                   | chr5  | Novel                        | Novel                        | 0.0001328 | 0.006049778 |
| rs718947     | intronic       | CTBP2                   | chr10 | Novel                        | Confirmed                    | 6.51E-06  | 0.006061564 |
| rs11064524   | intronic       | WNK1                    | chr12 | Novel                        | Confirmed                    | 5.16E-06  | 0.0063081   |
| rs3814878    | UTR5           | FAM57B                  | chr16 | <b>LD</b>                    | Novel                        | 2.80E-05  | 0.0063371   |
| rs1783598    | intronic       | FCHSD2                  | chr11 | Fasting glucose (22885924)   | Fasting glucose (22885924)   | 0.0003666 | 0.006435867 |
| rs2033530    | downstream     | TDRG1                   | chr6  | Novel                        | Confirmed                    | 8.22E-06  | 0.00650742  |
| rs12465802   | intronic       | R3HDM1                  | chr2  | Height (25282103)            | Height (25282103)            | 9.85E-06  | 0.006633446 |
| rs11066301   | intronic       | PTPN11                  | chr12 | Total cholesterol (20686565) | Total cholesterol (20686565) | 6.32E-06  | 0.006673692 |
| rs6723710    | ncRNA_intronic | LINC01122               | chr2  | Novel                        | Confirmed                    | 1.00E-05  | 0.006707388 |
| rs9296115    | intronic       | PACSIN1                 | chr6  | Novel                        | Novel                        | 6.80E-06  | 0.007031531 |
| rs11022762   | intronic       | ARNTL                   | chr11 | Novel                        | Confirmed                    | 1.95E-05  | 0.007220381 |
| rs285556     | intronic       | PDZRN4                  | chr12 | Novel                        | Confirmed                    | 6.80E-06  | 0.007611221 |
| rs10760450   | UTR3           | LMX1B                   | chr9  | Novel                        | Confirmed                    | 7.69E-06  | 0.007660047 |
| rs3922649    | intergenic     | LOC101928778,<br>SEC16B | chr1  | Novel                        | Confirmed, confirmed         | 6.72E-06  | 0.00766394  |
| rs1899689    | intronic       | CADPS2                  | chr7  | Novel                        | Novel                        | 6.68E-05  | 0.007969874 |
| rs3756784    | upstream       | MED23                   | chr6  | Novel                        | Novel                        | 0.0001189 | 0.008434906 |
| rs7970953    | intronic       | SOX5                    | chr12 | Novel                        | Confirmed                    | 1.52E-05  | 0.00878693  |
| rs836964     | intronic       | FAIM2                   | chr12 | Novel                        | Confirmed                    | 8.05E-06  | 0.008812782 |
| rs4686734    | intergenic     | ETV5, DGKG              | chr3  | Novel                        | Confirmed, confirmed         | 2.96E-05  | 0.009353304 |

|                   |            |                         |       |                                                                                                 |                      |           |             |
|-------------------|------------|-------------------------|-------|-------------------------------------------------------------------------------------------------|----------------------|-----------|-------------|
| <b>rs1609761</b>  | intronic   | REXO1                   | chr19 | Novel                                                                                           | Novel                | 3.62E-05  | 0.009428682 |
| <b>rs7594432</b>  | intronic   | DNMT3A                  | chr2  | Height (25282103)                                                                               | Confirmed            | 4.62E-05  | 0.009457659 |
| <b>rs823130</b>   | intronic   | NUCKS1                  | chr1  | Novel                                                                                           | Novel                | 0.0001112 | 0.009567833 |
| <b>rs763310</b>   | intronic   | KDM1A                   | chr1  | Novel                                                                                           | Novel                | 1.04E-05  | 0.009579896 |
| <b>rs8087237</b>  | intronic   | PTPN2                   | chr18 | Novel                                                                                           | Confirmed            | 8.37E-06  | 0.009581891 |
| <b>rs7239114</b>  | intergenic | ZBTB7C, CTIF            | chr18 | Novel                                                                                           | Novel, novel         | 3.58E-05  | 0.009653323 |
| <b>rs11625620</b> | intronic   | NRXN3                   | chr14 | Novel                                                                                           | Confirmed            | 1.03E-05  | 0.009673169 |
| <b>rs3752904</b>  | exonic     | ECE2                    | chr3  | Novel                                                                                           | Novel                | 4.81E-05  | 0.009763351 |
| <b>rs2225203</b>  | intergenic | LINC01065,<br>LINC00558 | chr13 | Novel                                                                                           | Novel, novel         | 1.47E-05  | 0.009920883 |
| <b>rs8048267</b>  | intronic   | ZFHX3                   | chr16 | Novel                                                                                           | Confirmed            | 6.15E-05  | 0.009988875 |
| <b>rs10913472</b> | intronic   | SEC16B                  | chr1  | Novel                                                                                           | Confirmed            | 1.08E-05  | 0.010480014 |
| <b>rs10774625</b> | intronic   | ATXN2                   | chr12 | Novel                                                                                           | Confirmed            | 1.28E-05  | 0.010884146 |
| <b>rs10932150</b> | exonic     | ZDBF2                   | chr2  | Novel                                                                                           | Confirmed            | 8.98E-05  | 0.011110275 |
| <b>rs17819063</b> | intronic   | FTO                     | chr16 | Novel                                                                                           | Confirmed            | 1.07E-05  | 0.011420296 |
| <b>rs825461</b>   | intronic   | ZNF664,<br>FAM101A      | chr12 | Waist hip ratio<br>adjusted for BMI in<br>females greater than<br>50 years of age<br>(26426971) | Confirmed, confirmed | 0.0003917 | 0.01143764  |
| <b>rs6510001</b>  | intergenic | URI1, ZNF536            | chr19 | Novel                                                                                           | Novel, confirmed     | 2.73E-05  | 0.011439555 |
| <b>rs1473</b>     | intronic   | PUM1                    | chr1  | Novel                                                                                           | Novel                | 0.0004889 | 0.01144026  |
| <b>rs2334255</b>  | UTR3       | GIPR                    | chr19 | Novel                                                                                           | Confirmed            | 0.0008051 | 0.011450311 |
| <b>rs11925138</b> | intronic   | CPNE4                   | chr3  | Novel                                                                                           | Confirmed            | 7.69E-05  | 0.011637533 |
| <b>rs882386</b>   | intronic   | DMXL2                   | chr15 | Novel                                                                                           | Confirmed            | 2.14E-05  | 0.011834154 |

|                   |            |                            |       |                                 |                              |           |             |
|-------------------|------------|----------------------------|-------|---------------------------------|------------------------------|-----------|-------------|
| <b>rs4717540</b>  | intronic   | AUTS2                      | chr7  | Novel                           | Confirmed                    | 0.0001241 | 0.012437147 |
| <b>rs17783165</b> | intronic   | CDH7                       | chr18 | Novel                           | Confirmed                    | 0.0001871 | 0.0127228   |
| <b>rs17211262</b> | intergenic | MMD,<br>TMEM100            | chr17 | Novel                           | Confirmed, novel             | 7.06E-05  | 0.012791893 |
| <b>rs4796221</b>  | intergenic | TBC1D3B,<br>ZNHIT3         | chr17 | Novel                           | Novel, novel                 | 7.06E-05  | 0.013475342 |
| <b>rs2161767</b>  | intergenic | MIR1302-4,<br>CREB1        | chr2  | Novel                           | Novel, confirmed             | 1.47E-05  | 0.013701993 |
| <b>rs4980550</b>  | intergenic | MYEOV,<br>LINC01488        | chr11 | Novel                           | Confirmed, novel             | 1.67E-05  | 0.013717911 |
| <b>rs329655</b>   | intergenic | IGSF9B,<br>LOC100128239    | chr11 | Novel                           | Novel, novel                 | 5.71E-05  | 0.013987777 |
| <b>rs2012284</b>  | intronic   | ANAPC4                     | chr4  | Novel                           | Novel                        | 0.0002204 | 0.014798286 |
| <b>rs7161194</b>  | downstream | MIR377                     | chr14 | Novel                           | Novel                        | 3.02E-05  | 0.014800976 |
| <b>rs17644631</b> | intergenic | LOC101927285,<br>MIR4432HG | chr2  | Novel                           | Confirmed, novel             | 0.000131  | 0.0148816   |
| <b>rs16969473</b> | intronic   | GPR139                     | chr16 | Novel                           | Confirmed                    | 3.36E-05  | 0.014918456 |
| <b>rs984677</b>   | intergenic | CASC20, BMP2               | chr20 | Height (23754948)               | Confirmed, confirmed         | 5.63E-05  | 0.015038298 |
| <b>rs2965189</b>  | intronic   | GATAD2A                    | chr19 | Total cholesterol<br>(24097068) | Height (25282103)            | 0.0002017 | 0.015311661 |
| <b>rs283553</b>   | intergenic | TFAP2B,<br>PKHD1           | chr6  | <b>LD</b>                       | Confirmed, novel             | 1.69E-05  | 0.015442775 |
| <b>rs2677031</b>  | intergenic | CALCR,<br>MIR4652          | chr7  | Novel                           | Confirmed, novel             | 1.63E-05  | 0.01561346  |
| <b>rs12104582</b> | intergenic | LOC400940,                 | chr2  | <b>LD</b>                       | Confirmed, hip circumference | 0.0001975 | 0.01570125  |

|                   |                |                      |       |                   |                      |           |             |
|-------------------|----------------|----------------------|-------|-------------------|----------------------|-----------|-------------|
|                   |                | LINC01247            |       |                   | (25673412)           |           |             |
| <b>rs2770102</b>  | ncRNA_intronic | CASC15               | chr6  | Novel             | Confirmed            | 1.66E-05  | 0.01586085  |
| <b>rs3776569</b>  | intronic       | SLC1A3               | chr5  | Novel             | Novel                | 4.80E-05  | 0.015938517 |
| <b>rs6060001</b>  | intronic       | TP53INP2             | chr20 | Height (25282103) | Height (25282103)    | 0.0003549 | 0.01604655  |
| <b>rs3818717</b>  | exonic         | RAI1                 | chr17 | Novel             | Novel                | 0.0003603 | 0.016049727 |
| <b>rs12129408</b> | intergenic     | ADGRL2,<br>LINC01361 | chr1  | Novel             | Novel, novel         | 1.97E-05  | 0.016094004 |
| <b>rs889203</b>   | intronic       | GPR139               | chr16 | <b>LD</b>         | Confirmed            | 3.04E-05  | 0.016683789 |
| <b>rs10775267</b> | intergenic     | GPR139, GP2          | chr16 | Novel             | Confirmed, confirmed | 0.0002636 | 0.01690335  |
| <b>rs11674696</b> | intergenic     | MIR1302-4,<br>CREB1  | chr2  | Novel             | Novel, confirmed     | 2.76E-05  | 0.017081996 |
| <b>rs10271989</b> | ncRNA_intronic | LOC101928782         | chr7  | Novel             | Novel                | 0.0001902 | 0.017264308 |
| <b>rs1320252</b>  | intergenic     | MAP2K3,<br>KCNJ12    | chr17 | <b>LD</b>         | Confirmed, confirmed | 3.55E-05  | 0.017606529 |
| <b>rs2903940</b>  | intronic       | EYA2                 | chr20 | Novel             | Confirmed            | 0.0002556 | 0.017729345 |
| <b>rs9322955</b>  | intergenic     | NFKBIA,<br>INSM2     | chr14 | Novel             | Confirmed, novel     | 2.74E-05  | 0.019324319 |
| <b>rs10514944</b> | intronic       | SKAP1                | chr17 | Novel             | Confirmed            | 0.0002798 | 0.019332431 |
| <b>rs231976</b>   | intergenic     | IL27, NUPR1          | chr16 | Novel             | Novel, novel         | 2.14E-05  | 0.019340286 |
| <b>rs2457831</b>  | intergenic     | INADL, L1TD1         | chr1  | Novel             | Confirmed, novel     | 2.27E-05  | 0.019389345 |
| <b>rs6904716</b>  | intronic       | LEMD2                | chr6  | Novel             | Confirmed            | 0.0001121 | 0.019463133 |
| <b>rs3759579</b>  | upstream       | MARK3                | chr14 | Novel             | Novel                | 2.18E-05  | 0.019637877 |
| <b>rs836525</b>   | intronic       | DAGLB                | chr7  | Novel             | Novel                | 5.83E-05  | 0.019785293 |
| <b>rs941737</b>   | intergenic     | STXBP6,<br>NOVA1     | chr14 | Novel             | Confirmed, confirmed | 8.98E-05  | 0.020287948 |



|                   |                |                     |       |                                            |                          |           |             |
|-------------------|----------------|---------------------|-------|--------------------------------------------|--------------------------|-----------|-------------|
| <b>rs12406019</b> | intergenic     | GIPC2,<br>MGC27382  | chr1  | Hip circumference in<br>females (25673412) | Height (25282103), novel | 2.61E-05  | 0.021112019 |
| <b>rs6766759</b>  | intronic       | FAM19A1             | chr3  | Novel                                      | Novel                    | 5.55E-05  | 0.021609989 |
| <b>rs2524099</b>  | downstream     | HLA-C               | chr6  | Novel                                      | Novel                    | 2.63E-05  | 0.022061256 |
| <b>rs10114139</b> | intergenic     | STRBP, CRB2         | chr9  | Novel                                      | Novel, confirmed         | 0.0003249 | 0.02239245  |
| <b>rs6867577</b>  | intronic       | FBXL17              | chr5  | Novel                                      | Confirmed                | 4.18E-05  | 0.022967669 |
| <b>rs756717</b>   | intronic       | ZFH3                | chr16 | Novel                                      | Confirmed                | 7.85E-05  | 0.022986011 |
| <b>rs11037685</b> | intergenic     | HSD17B12,<br>ALKBH3 | chr11 | Novel                                      | Confirmed, novel         | 8.55E-05  | 0.02308269  |
| <b>rs11100760</b> | intronic       | INPP4B              | chr4  | Novel                                      | Novel                    | 0.0001477 | 0.023176989 |
| <b>rs9450537</b>  | intergenic     | SNHG5,<br>HTR1E     | chr6  | Novel                                      | Novel, novel             | 0.0001392 | 0.023706533 |
| <b>rs11075994</b> | intronic       | FTO                 | chr16 | Novel                                      | Confirmed                | 0.0001272 | 0.0240408   |
| <b>rs11755266</b> | intergenic     | TCP11,<br>SCUBE3    | chr6  | Height (23754948)                          | Height (18391951)        | 9.96E-05  | 0.024225664 |
| <b>rs17667540</b> | ncRNA_intronic | SCHLAP1             | chr2  | Novel                                      | Confirmed                | 0.0001953 | 0.024264217 |
| <b>rs2273684</b>  | intronic       | GSS                 | chr20 | Height (25282103)                          | Height (25282103)        | 0.0003858 | 0.024621055 |
| <b>rs2280406</b>  | upstream       | MST1R               | chr3  | Novel                                      | Novel                    | 5.63E-05  | 0.02479517  |
| <b>rs12436181</b> | intronic       | TRAF3               | chr14 | Novel                                      | Confirmed                | 0.0001721 | 0.024848825 |
| <b>rs12912380</b> | intronic       | SEMA6D              | chr15 | Novel                                      | Confirmed                | 5.63E-05  | 0.0251098   |
| <b>rs12245680</b> | intronic       | TCF7L2              | chr10 | T2D (24509480)                             | Confirmed                | 0.01444   | 0.02527     |
| <b>rs1015055</b>  | intronic       | NTM                 | chr11 | Novel                                      | Confirmed                | 0.0003049 | 0.025481855 |
| <b>rs10838708</b> | intronic       | PSMC3               | chr11 | Height (25282103)                          | Height (25282103)        | 3.63E-05  | 0.025743288 |
| <b>rs1604038</b>  | intergenic     | EIF5A2,<br>SLC2A2   | chr3  | Fasting glucose<br>(22885924)              | Novel, confirmed         | 0.001247  | 0.026394833 |

|                   |                |                        |       |                   |                      |           |             |
|-------------------|----------------|------------------------|-------|-------------------|----------------------|-----------|-------------|
| <b>rs9512670</b>  | intergenic     | RASL11A,<br>GTF3A      | chr13 | Novel             | Novel, confirmed     | 0.0001385 | 0.026899036 |
| <b>rs7612543</b>  | intronic       | ZBTB38                 | chr3  | Height (25282103) | Confirmed            | 0.0001385 | 0.027807901 |
| <b>rs500422</b>   | UTR5           | USP37                  | chr2  | Height (25282103) | Confirmed            | 3.49E-05  | 0.028400844 |
| <b>rs12923427</b> | intergenic     | XYLT1,<br>NPIPA8       | chr16 | Novel             | Novel, novel         | 0.0006042 | 0.028822578 |
| <b>rs716591</b>   | intergenic     | MCTP2,<br>LOC440311    | chr15 | Novel             | Confirmed, novel     | 0.0003772 | 0.028859498 |
| <b>rs1593374</b>  | ncRNA_intronic | LOC102724623           | chr8  | Novel             | Confirmed            | 0.000196  | 0.029176438 |
| <b>rs1500486</b>  | intergenic     | GNPDA2,<br>GABRG1      | chr4  | Novel             | Confirmed, novel     | 6.33E-05  | 0.029356162 |
| <b>rs17231277</b> | intergenic     | LOC101928435,<br>PSMG1 | chr21 | Novel             | Novel, novel         | 3.68E-05  | 0.029578488 |
| <b>rs2886070</b>  | intergenic     | ARHGEF2,<br>SSR2       | chr1  | Novel             | Novel, novel         | 0.0002133 | 0.030396672 |
| <b>rs10470517</b> | intergenic     | DNAJC19,<br>SOX2-OT    | chr3  | Novel             | Novel, novel         | 9.86E-05  | 0.030676193 |
| <b>rs1434285</b>  | intergenic     | AMIGO1,<br>GPR61       | chr1  | Novel             | Novel, confirmed     | 0.0001318 | 0.031080446 |
| <b>rs7689420</b>  | intronic       | HHIP                   | chr4  | Height (25282103) | Confirmed            | 0.000124  | 0.031907087 |
| <b>rs879070</b>   | intronic       | DENND1A                | chr9  | Novel             | Confirmed            | 0.0009762 | 0.031957705 |
| <b>rs2488071</b>  | intergenic     | HHEX, EXOC6            | chr10 | Novel             | Confirmed, confirmed | 0.006642  | 0.032103    |
| <b>rs16850638</b> | intergenic     | MIR548A3,<br>ALCAM     | chr3  | Novel             | Novel, confirmed     | 0.00012   | 0.032544255 |
| <b>rs6747219</b>  | ncRNA_intronic | LINC01122              | chr2  | Novel             | Confirmed            | 0.0002862 | 0.032587773 |

|                   |              |                            |       |                                   |                      |           |             |
|-------------------|--------------|----------------------------|-------|-----------------------------------|----------------------|-----------|-------------|
| <b>rs2306369</b>  | exonic       | KIAA1109                   | chr4  | Novel                             | Novel                | 0.0002967 | 0.033628952 |
| <b>rs704084</b>   | intergenic   | DUSP6, POC1B               | chr12 | Novel                             | Novel, novel         | 5.39E-05  | 0.034126828 |
| <b>rs11979110</b> | intergenic   | KLF14,<br>MIR29A           | chr7  | HDL/HDL cholesterol<br>(24097068) | Confirmed, novel     | 0.00288   | 0.03456     |
| <b>rs2862299</b>  | intronic     | SEC16B                     | chr1  | Novel                             | Confirmed, confirmed | 0.0001289 | 0.03521574  |
| <b>rs621042</b>   | intronic     | PIK3C2G                    | chr12 | Novel                             | Confirmed            | 5.03E-05  | 0.035303938 |
| <b>rs2212450</b>  | intergenic   | LOC387810,<br>LOC101928847 | chr11 | Novel                             | Novel, novel         | 5.03E-05  | 0.035350484 |
| <b>rs10853100</b> | intergenic   | LOC101927166,<br>HOXB1     | chr17 | Novel                             | Novel, novel         | 5.63E-05  | 0.035800418 |
| <b>rs6474952</b>  | intronic     | CCDC171                    | chr9  | <b>LD</b>                         | Confirmed            | 0.0001975 | 0.035949202 |
| <b>rs12050677</b> | intronic     | OTUD7A                     | chr15 | Novel                             | Novel                | 0.0004653 | 0.0359691   |
| <b>rs3814614</b>  | intergenic   | GRID1, WAPL                | chr10 | Novel                             | Confirmed, novel     | 0.001154  | 0.0360625   |
| <b>rs732310</b>   | intronic     | REXO1                      | chr19 | Novel                             | Novel                | 0.0001545 | 0.036143822 |
| <b>rs4329699</b>  | intronic     | NTM                        | chr11 | Novel                             | Confirmed            | 0.0004894 | 0.036563986 |
| <b>rs2100814</b>  | intergenic   | ELP3, PNOC                 | chr8  | Novel                             | Confirmed, novel     | 0.001864  | 0.036993231 |
| <b>rs10898868</b> | intronic     | ARAP1                      | chr11 | log(Proinsulin)<br>(21873549)     | Confirmed            | 0.002589  | 0.0370227   |
| <b>rs214246</b>   | intronic     | AXIN1                      | chr16 | Novel                             | Confirmed            | 0.0001545 | 0.037419608 |
| <b>rs6500208</b>  | intergenic   | MIR5095,<br>CBLN1          | chr16 | Novel                             | Novel, confirmed     | 5.56E-05  | 0.037479969 |
| <b>rs834027</b>   | intronic     | UBAP2                      | chr9  | Novel                             | Novel                | 0.001299  | 0.037598833 |
| <b>rs2505276</b>  | intergenic   | TFAP2B,<br>PKHD1           | chr6  | <b>LD</b>                         | Confirmed, novel     | 5.16E-05  | 0.037811686 |
| <b>rs3803522</b>  | ncRNA_exonic | LOC101929076               | chr15 | Novel                             | Novel                | 0.0001039 | 0.039104627 |

|                   |                |                           |       |           |                  |           |             |
|-------------------|----------------|---------------------------|-------|-----------|------------------|-----------|-------------|
| <b>rs1078101</b>  | intergenic     | HAAO,<br>LOC102723854     | chr2  | Novel     | Novel, novel     | 0.0001768 | 0.0392548   |
| <b>rs6021796</b>  | intergenic     | ZFP64,<br>LINC01524       | chr20 | Novel     | Confirmed, novel | 0.0001768 | 0.03926728  |
| <b>rs12066815</b> | intronic       | NTNG1                     | chr1  | Novel     | Novel            | 9.19E-05  | 0.03936521  |
| <b>rs4414033</b>  | intergenic     | C1orf61,<br>MEF2D         | chr1  | Novel     | Novel, novel     | 7.78E-05  | 0.039446552 |
| <b>rs4978760</b>  | intronic       | IKBKAP                    | chr9  | Novel     | Novel            | 0.0005474 | 0.039728251 |
| <b>rs13337591</b> | intronic       | FTO                       | chr16 | Novel     | Confirmed        | 6.53E-05  | 0.039910651 |
| <b>rs2550739</b>  | intergenic     | MIR4720,<br>CMIP          | chr16 | Novel     | Novel, confirmed | 0.0001472 | 0.039915508 |
| <b>rs4809440</b>  | intergenic     | SLC17A9,<br>BHLHE23       | chr20 | Novel     | Novel, novel     | 0.0005606 | 0.040829051 |
| <b>rs8001047</b>  | intergenic     | PDS5B,<br>LINC00423       | chr13 | Novel     | Confirmed, novel | 0.001864  | 0.040883733 |
| <b>rs11815022</b> | intronic       | PAX2                      | chr10 | Novel     | Confirmed        | 6.33E-05  | 0.040918054 |
| <b>rs7020269</b>  | intergenic     | C9orf72,<br>LINGO2        | chr9  | Novel     | Novel, confirmed | 0.001427  | 0.041065889 |
| <b>rs1037954</b>  | ncRNA_intronic | LOC101927314,<br>MIR548H3 | chr6  | Novel     | Confirmed, novel | 6.33E-05  | 0.041476895 |
| <b>rs7801936</b>  | intronic       | FKBP6                     | chr7  | Novel     | Novel            | 0.0007047 | 0.041705427 |
| <b>rs1993414</b>  | intergenic     | TMEM26-AS1,<br>C10orf107  | chr10 | Novel     | Novel, novel     | 0.0001133 | 0.041955785 |
| <b>rs1320366</b>  | intergenic     | FAM150B,<br>TMEM18        | chr2  | <b>LD</b> | Novel, confirmed | 6.87E-05  | 0.042030092 |

|                   |            |                         |       |                               |                                          |           |             |
|-------------------|------------|-------------------------|-------|-------------------------------|------------------------------------------|-----------|-------------|
| <b>rs7821182</b>  | intergenic | LINC01419,<br>RALYL     | chr8  | <b>LD</b>                     | Novel, confirmed                         | 6.33E-05  | 0.042750496 |
| <b>rs8101491</b>  | intronic   | SAE1                    | chr19 | Novel                         | Novel                                    | 8.74E-05  | 0.043578635 |
| <b>rs1008007</b>  | intronic   | LTBP2                   | chr14 | Novel                         | Novel                                    | 7.12E-05  | 0.044755282 |
| <b>rs3750450</b>  | exonic     | EPB41L4B                | chr9  | Novel                         | Confirmed                                | 0.0007529 | 0.045174    |
| <b>rs305002</b>   | intergenic | LINC00593,<br>TLE3      | chr15 | Novel                         | Novel, novel                             | 0.0006339 | 0.045332654 |
| <b>rs7972585</b>  | intergenic | MVK,<br>FAM222A         | chr12 | Novel                         | Novel, novel                             | 9.42E-05  | 0.045396751 |
| <b>rs3784635</b>  | exonic     | VPS13C                  | chr15 | Novel                         | Confirmed                                | 0.001758  | 0.0455908   |
| <b>rs2018218</b>  | intronic   | NCR3LG1                 | chr11 | Novel                         | Novel                                    | 0.0006148 | 0.045596263 |
| <b>rs2710508</b>  | intronic   | EPHA4                   | chr2  | Novel                         | Confirmed                                | 6.85E-05  | 0.045740872 |
| <b>rs10228276</b> | downstream | HOTTIP                  | chr7  | Novel                         | Novel                                    | 0.0001161 | 0.046225662 |
| <b>rs11211176</b> | intergenic | IPP, MAST2              | chr1  | Height (25282103)             | Novel, confirmed                         | 0.0004653 | 0.046248371 |
| <b>rs534523</b>   | intergenic | MIR124-1,<br>MSRA       | chr8  | Novel                         | Novel, adiposity (19557161)              | 0.001566  | 0.0466668   |
| <b>rs605765</b>   | intergenic | KCNA4, FSHB             | chr11 | Novel                         | Novel, confirmed                         | 0.0002843 | 0.046693314 |
| <b>rs2485534</b>  | intronic   | GRIN3A                  | chr9  | Novel                         | Novel                                    | 0.001696  | 0.0468096   |
| <b>rs4678856</b>  | intergenic | ARPP21, STAC            | chr3  | Novel                         | Novel, confirmed                         | 8.00E-05  | 0.047525111 |
| <b>rs4474658</b>  | intergenic | C2CD4A,<br>C2CD4B       | chr15 | log(Proinsulin)<br>(21873549) | Height (20881960), confirmed             | 0.009024  | 0.048987429 |
| <b>rs1438995</b>  | intergenic | LINC00936,<br>LINC00615 | chr12 | Novel                         | Novel, novel                             | 9.72E-05  | 0.048996122 |
| <b>rs3911565</b>  | intronic   | FAT3                    | chr11 | Novel                         | Glucose homeostasis traits<br>(25524916) | 0.0006653 | 0.049335883 |

|                  |          |        |       |       |       |           |             |
|------------------|----------|--------|-------|-------|-------|-----------|-------------|
| <b>rs4937729</b> | intronic | OPCML  | chr11 | Novel | Novel | 0.001046  | 0.049390813 |
| <b>rs2275003</b> | intronic | DCAF12 | chr9  | Novel | Novel | 0.0004117 | 0.049943469 |

**Notes:**

**SNP type** means whether SNPs identified in our study compared to the original BMI GWAS and previous studies are Novel or Confirmed or associated with BMI-related traits (trait (PMID)) or in high LD with BMI-associated loci.

**Gene type** means whether genes identified in our study compared to the original BMI GWAS and previous studies are Novel or Confirmed.

**P.valueA** is the p value of BMI, A is BMI.

**cFDR.AcB** is the cFDR value of BMI conditioned on T2D, B is T2D.

**Table S3 SNPs in high LD ( $R^2 > 0.6$ ) with BMI-associated loci**

| <b>SNP</b> | <b>R2</b> | <b>Proxy SNP</b> | <b>PMID</b>          | <b>Trait</b>                               |
|------------|-----------|------------------|----------------------|--------------------------------------------|
| rs2235569  | 0.962     | rs2814992        | GIANT (25673413)     | BMI                                        |
| rs17243334 | 0.675     | rs997295         | GIANT (25673413)     | BMI                                        |
| rs7503807  | 0.967     | rs12940622       | GIANT (25673413)     | BMI                                        |
| rs4949662  | 0.933     | rs17381664       | GIANT (25673413)     | BMI                                        |
| rs11632574 | 0.677     | rs8032675        | GIANT (25673413)     | BMI                                        |
| rs10840103 | 0.848     | rs4929949        | Wheeler E (23563609) | Extreme obesity with early<br>age of onset |
| rs1861569  | 0.933     | rs2908884        | GIANT (25673413)     | BMI                                        |
| rs1549979  | 0.665     | rs12637027       | GIANT (25673413)     | BMI                                        |
| rs9784046  | 0.633     | rs12714412       | GIANT (25673413)     | BMI                                        |
| rs9381901  | 1         | rs2744489        | GIANT (25673413)     | BMI                                        |
| rs9408902  | 1         | rs1928295        | GIANT (25673413)     | BMI                                        |
| rs12127789 | 0.851     | rs12134600       | GIANT (25673413)     | BMI                                        |
| rs7232886  | 1         | rs8085349        | GIANT (25673413)     | BMI                                        |
| rs4771946  | 0.818     | rs9634490        | GIANT (23563607)     | Obesity                                    |
| rs9659092  | 0.836     | rs11583200       | GIANT (25673413)     | BMI                                        |
| rs7228347  | 0.789     | rs17066856       | GIANT (25673413)     | BMI                                        |
| rs17326595 | 0.647     | rs448376         | GIANT (23563607)     | Overweight                                 |
| rs3814878  | 0.65      | rs12325539       | GIANT (25282103)     | height                                     |
| rs283553   | 0.658     | rs4711966        | GIANT (25673413)     | BMI                                        |
| rs12104582 | 0.964     | rs10929925       | GIANT (25673412)     | Hip circumference                          |

---

|                  |       |            |                  |        |
|------------------|-------|------------|------------------|--------|
| <b>rs889203</b>  | 0.774 | rs11074422 | GIANT (25673413) | BMI    |
| <b>rs1320252</b> | 0.866 | rs1914888  | GIANT (25282103) | Height |
| <b>rs6474952</b> | 0.755 | rs4740619  | GIANT (25673413) | BMI    |
| <b>rs2505276</b> | 0.655 | rs12529657 | GIANT (25673413) | BMI    |
| <b>rs1320366</b> | 0.737 | rs10209658 | GIANT (25673413) | BMI    |
| <b>rs7821182</b> | 0.726 | rs2033732  | GIANT (25673413) | BMI    |

---



**Table S4 Conditional FDR value for T2D given the BMI (cFDR < 0.05).**

| <b>RSID</b>       | <b>ROLE</b>    | <b>GENE</b>           | <b>CHR</b> | <b>SNP type</b>               | <b>Gene type</b> | <b>P.valueB</b> | <b>cFDR.BcA</b> |
|-------------------|----------------|-----------------------|------------|-------------------------------|------------------|-----------------|-----------------|
| <b>rs10787472</b> | intronic       | TCF7L2                | chr10      | Confirmed                     | Confirmed        | 1.30E-36        | 6.63E-35        |
| <b>rs4481184</b>  | intronic       | IGF2BP2               | chr3       | Confirmed                     | Confirmed        | 4.50E-22        | 6.55E-20        |
| <b>rs6906327</b>  | intronic       | CDKAL1                | chr6       | Confirmed                     | Confirmed        | 1.10E-23        | 1.82E-19        |
| <b>rs9930506</b>  | intronic       | FTO                   | chr16      | BMI (25673413)                | Confirmed        | 1.90E-10        | 1.90E-10        |
| <b>rs849135</b>   | intronic       | JAZF1                 | chr7       | T2D (22885922)                | Confirmed        | 1.70E-09        | 7.08E-08        |
| <b>rs2881654</b>  | intronic       | PPARG                 | chr3       | Confirmed                     | Confirmed        | 3.40E-09        | 7.82E-08        |
| <b>rs12245680</b> | intronic       | TCF7L2                | chr10      | Confirmed                     | Confirmed        | 1.10E-09        | 6.70E-07        |
| <b>rs163177</b>   | intronic       | KCNQ1                 | chr11      | Confirmed                     | Confirmed        | 2.00E-10        | 2.10E-06        |
| <b>rs4430796</b>  | intronic       | HNF1B                 | chr17      | T2D (26551672)                | Confirmed        | 8.90E-10        | 9.19E-06        |
| <b>rs6103716</b>  | intronic       | HNF4A                 | chr20      | Confirmed                     | Confirmed        | 6.90E-09        | 1.27E-05        |
| <b>rs10811658</b> | intergenic     | CDKN2B-AS1,<br>DMRTA1 | chr9       | Confirmed                     | Confirmed        | 5.00E-08        | 9.08E-05        |
| <b>rs12624485</b> | intergenic     | FITM2, R3HDML         | chr20      | Confirmed                     | Confirmed        | 2.00E-08        | 0.000131        |
| <b>rs4812831</b>  | ncRNA_intronic | HNF4A-AS1             | chr20      | Novel                         | Novel            | 1.20E-07        | 0.000209        |
| <b>rs7119</b>     | UTR3           | HMG20A                | chr15      | Novel                         | Confirmed        | 6.50E-08        | 0.000264        |
| <b>rs3843467</b>  | intronic       | C5orf67               | chr5       | Triglycerides<br>(20686565)   | Novel            | 2.40E-07        | 0.000293        |
| <b>rs7079711</b>  | intronic       | TCF7L2                | chr10      | Novel                         | Confirmed        | 2.40E-07        | 0.000339        |
| <b>rs4753073</b>  | intergenic     | MTNR1B,<br>SLC36A4    | chr11      | Fasting glucose<br>(20081858) | Confirmed, novel | 5.70E-07        | 0.000373        |
| <b>rs17013383</b> | ncRNA_intronic | MIR548AC              | chr3       | T2D (22158537)                | Confirmed        | 5.50E-07        | 0.000549        |

|                   |                |                        |       |                               |                      |          |          |
|-------------------|----------------|------------------------|-------|-------------------------------|----------------------|----------|----------|
| <b>rs2283228</b>  | intronic       | KCNQ1                  | chr11 | <b>LD</b>                     | Confirmed            | 7.20E-08 | 0.000628 |
| <b>rs2488071</b>  | intergenic     | HHEX, EXOC6            | chr10 | Novel                         | Confirmed            | 4.70E-06 | 0.001119 |
| <b>rs7141420</b>  | intronic       | NRXN3                  | chr14 | BMI (25673413)                | BMI (25673413)       | 0.00025  | 0.001125 |
| <b>rs6885904</b>  | ncRNA_intronic | ZBED3-AS1              | chr5  | Novel                         | Confirmed            | 1.50E-06 | 0.00173  |
| <b>rs4686698</b>  | intronic       | IGF2BP2                | chr3  | Novel                         | Confirmed            | 1.70E-06 | 0.001765 |
| <b>rs231354</b>   | ncRNA_exonic   | KCNQ1OT1               | chr11 | Novel                         | Confirmed            | 4.60E-07 | 0.001934 |
| <b>rs11514706</b> | intergenic     | DGKB, AGMO             | chr7  | Fasting glucose<br>(20081858) | Confirmed, confirmed | 2.20E-06 | 0.002021 |
| <b>rs3130931</b>  | UTR5           | POU5F1                 | chr6  | Height (25282103)             | Confirmed            | 5.10E-06 | 0.002127 |
| <b>rs10885414</b> | intronic       | TCF7L2                 | chr10 | Novel                         | Confirmed            | 1.00E-05 | 0.003658 |
| <b>rs2291720</b>  | intergenic     | ZNF385D-AS2,<br>UBE2E2 | chr3  | T2D (22158537)                | Confirmed, confirmed | 4.60E-06 | 0.003868 |
| <b>rs6991067</b>  | intronic       | INTS8                  | chr8  | <b>LD</b>                     | Confirmed            | 3.00E-06 | 0.005432 |
| <b>rs12217971</b> | intergenic     | CDC123,<br>CAMK1D      | chr10 | Novel                         | Confirmed            | 8.70E-06 | 0.005586 |
| <b>rs6795735</b>  | ncRNA_intronic | ADAMTS9-AS2            | chr3  | T2D (22885922)                | Confirmed            | 2.00E-04 | 0.00604  |
| <b>rs17150816</b> | intergenic     | MIR124-1, MSRA         | chr8  | Novel                         | Novel, novel         | 5.50E-06 | 0.006156 |
| <b>rs12895330</b> | intergenic     | AKAP6, NPAS3           | chr14 | Novel                         | Novel, novel         | 0.00021  | 0.007245 |
| <b>rs3892710</b>  | intergenic     | HLA-DQB1,<br>HLA-DQA2  | chr6  | T1D (17632545)                | Confirmed, confirmed | 2.10E-05 | 0.007928 |
| <b>rs234857</b>   | intronic       | KCNQ1                  | chr11 | Novel                         | Confirmed            | 8.50E-06 | 0.008189 |
| <b>rs17791633</b> | intergenic     | LOC101927450,<br>TLE4  | chr9  | <b>LD</b>                     | Confirmed, confirmed | 1.90E-06 | 0.008887 |
| <b>rs7965349</b>  | intronic       | OASL                   | chr12 | <b>LD</b>                     | Confirmed            | 2.80E-06 | 0.008893 |
| <b>rs1019029</b>  | intergenic     | ARL4A, ETV1            | chr7  | Novel                         | Novel, novel         | 1.10E-05 | 0.009012 |

|                   |                |                       |       |                               |                              |          |          |
|-------------------|----------------|-----------------------|-------|-------------------------------|------------------------------|----------|----------|
| <b>rs2327778</b>  | intergenic     | SLC35D3, NHEG1        | chr6  | Novel                         | Confirmed, novel             | 5.30E-06 | 0.009304 |
| <b>rs2789686</b>  | UTR3           | ANXA11                | chr10 | Novel                         | Novel                        | 1.30E-05 | 0.01137  |
| <b>rs7812465</b>  | intronic       | NDUFAF6               | chr8  | <b>LD</b>                     | Confirmed                    | 2.40E-06 | 0.011919 |
| <b>rs11659412</b> | intronic       | LAMA1                 | chr18 | <b>LD</b>                     | Confirmed                    | 8.60E-06 | 0.013306 |
| <b>rs17013152</b> | ncRNA_intronic | MIR548AC              | chr3  | <b>LD</b>                     | Novel                        | 2.70E-05 | 0.013819 |
| <b>rs11979110</b> | intergenic     | KLF14, MIR29A         | chr7  | HDL (20686565)                | Confirmed, novel             | 9.70E-05 | 0.014097 |
| <b>rs2540074</b>  | intronic       | STRBP                 | chr9  | Novel                         | Novel                        | 6.50E-05 | 0.014357 |
| <b>rs7026633</b>  | intergenic     | LOC101927450,<br>TLE4 | chr9  | Novel                         | Confirmed, confirmed         | 1.00E-05 | 0.017157 |
| <b>rs290483</b>   | intronic       | TCF7L2                | chr10 | Novel                         | Confirmed                    | 1.70E-05 | 0.017162 |
| <b>rs530703</b>   | intergenic     | NPBWR2, MYT1          | chr20 | Novel                         | Novel, novel                 | 4.60E-05 | 0.017204 |
| <b>rs7005140</b>  | intergenic     | SLC30A8, MED30        | chr8  | Fasting glucose<br>(22885924) | Confirmed, novel             | 1.90E-05 | 0.0176   |
| <b>rs2334255</b>  | UTR3           | GIPR                  | chr19 | Novel                         | BMI (20935630)               | 0.00034  | 0.017642 |
| <b>rs4712540</b>  | intronic       | CDKAL1                | chr6  | T2D (26551672)                | Confirmed                    | 8.00E-06 | 0.017913 |
| <b>rs2466292</b>  | downstream     | SLC30A8               | chr8  | T2D (26551672)                | Confirmed                    | 1.70E-05 | 0.018263 |
| <b>rs1783598</b>  | intronic       | FCHSD2                | chr11 | log(Proinsulin)<br>(21873549) | Novel                        | 0.00052  | 0.019356 |
| <b>rs2190324</b>  | intergenic     | ARL4A, ETV1           | chr7  | Novel                         | Novel, novel                 | 9.20E-06 | 0.021039 |
| <b>rs11548393</b> | UTR3           | SPRED2                | chr2  | Novel                         | Novel                        | 1.10E-05 | 0.023013 |
| <b>rs17584208</b> | intergenic     | PSRC1, MYBPHL         | chr1  | LDL (20686565)                | LDL GLGC(20686565),<br>novel | 0.0016   | 0.02976  |
| <b>rs9349534</b>  | intergenic     | DEFB112,<br>TFAP2D    | chr6  | Novel                         | Novel, novel                 | 4.50E-05 | 0.03216  |
| <b>rs7748736</b>  | intronic       | SSR1                  | chr6  | Novel                         | Confirmed                    | 3.20E-05 | 0.035146 |

|                   |            |                            |       |                               |                                                      |          |          |
|-------------------|------------|----------------------------|-------|-------------------------------|------------------------------------------------------|----------|----------|
| <b>rs1473</b>     | intronic   | PUM1                       | chr1  | Novel                         | Novel                                                | 0.00092  | 0.03542  |
| <b>rs10898868</b> | intronic   | ARAP1                      | chr11 | log(Proinsulin)<br>(21873549) | Confirmed                                            | 0.00044  | 0.03608  |
| <b>rs11639314</b> | intronic   | PEAK1                      | chr15 | <b>LD</b>                     | Novel                                                | 3.90E-05 | 0.036597 |
| <b>rs1996023</b>  | intergenic | GNPDA2,<br>GABRG1          | chr4  | BMI (25673413)                | BMI (25673413), novel                                | 0.025    | 0.0375   |
| <b>rs10743609</b> | intergenic | KLHL42, PTHLH              | chr12 | Novel                         | Novel, novel                                         | 1.60E-05 | 0.038647 |
| <b>rs3898882</b>  | intergenic | BCL2L11,<br>MIR4435-1      | chr2  | <b>LD</b>                     | Novel, novel                                         | 0.00011  | 0.038885 |
| <b>rs9268402</b>  | intergenic | C6orf10, HCG23             | chr6  | Novel                         | Novel, novel                                         | 0.00013  | 0.04056  |
| <b>rs7186510</b>  | intronic   | CMIP                       | chr16 | Novel                         | Novel                                                | 3.00E-04 | 0.044373 |
| <b>rs825461</b>   | intronic   | ZNF664,<br>FAM101A         | chr12 | HDL (24097068)                | Waist-to-hip ratio<br>adjusted for BMI<br>(25673412) | 0.0013   | 0.04472  |
| <b>rs7586601</b>  | intergenic | GTF3C2, EIF2B4             | chr2  | Triglycerides<br>(20686565)   | Novel, novel                                         | 0.00024  | 0.0449   |
| <b>rs192710</b>   | intergenic | TSPAN15,<br>NEUROG3        | chr10 | Novel                         | Novel, novel                                         | 5.80E-05 | 0.044956 |
| <b>rs16945088</b> | intronic   | FTO                        | chr16 | BMI (25673413)                | Confirmed                                            | 0.0072   | 0.045    |
| <b>rs9540493</b>  | intergenic | LOC102723968,<br>LINC01052 | chr13 | BMI (25673413)                | Novel, novel                                         | 0.0057   | 0.0456   |
| <b>rs11247980</b> | intergenic | CTBP1-AS2,<br>MAEA         | chr4  | Novel                         | Confirmed, confirmed                                 | 6.60E-05 | 0.047601 |
| <b>rs4238585</b>  | intergenic | GPR139, GP2                | chr16 | BMI (25673413)                | Novel, BMI (22344219)                                | 0.0069   | 0.0483   |
| <b>rs12454712</b> | intronic   | BCL2                       | chr18 | T2D (22325160)                | Confirmed                                            | 0.0034   | 0.048571 |

---

|           |      |       |      |       |       |         |          |
|-----------|------|-------|------|-------|-------|---------|----------|
| rs1147322 | UTR5 | ZBTB6 | chr9 | Novel | Novel | 0.00039 | 0.048927 |
|-----------|------|-------|------|-------|-------|---------|----------|

---

**Notes:**

**SNP type** means whether SNPs identified in our study compared to the original T2D GWAS and previous studies are Novel or Confirmed or associated with T2D-related traits (trait (PMID)) or in high LD with T2D-associated loci.

**Gene type** means whether genes identified in our study compared to the original T2D GWAS and previous studies are Novel or Confirmed.

**P.valueB** is the p value of T2D, B is T2D.

**cFDR.BcA** is the cFDR value of T2D conditioned on BMI, A is BMI.

**Table S5 SNPs in high LD ( $R^2 > 0.6$ ) with T2D-associated loci**

| <b>SNP</b> | <b>R2</b> | <b>Proxy SNP</b> | <b>PMID</b>          | <b>Trait</b> |
|------------|-----------|------------------|----------------------|--------------|
| rs2283228  | 1         | rs2237892        | DIAGRAM (24509480)   | T2D          |
| rs6991067  | 0.621     | rs13257021       | DIAGRAM (24509480)   | T2D          |
| rs17791633 | 0.785     | rs13292136       | Voight BF (20581827) | T2D          |
| rs7965349  | 0.817     | rs7957197        | Voight BF (20581827) | T2D          |
| rs7812465  | 0.688     | rs10099941       | DIAGRAM (24509480)   | T2D          |
| rs11659412 | 0.851     | rs8090011        | Perry JR (22693455)  | T2D          |
| rs17013152 | 1         | rs17012998       | Cho YS (22158537)    | T2D          |
| rs11639314 | 0.606     | rs12911371       | DIAGRAM (24509480)   | T2D          |
| rs3898882  | 0.813     | rs7565457        | GIANT (25673413)     | Height       |

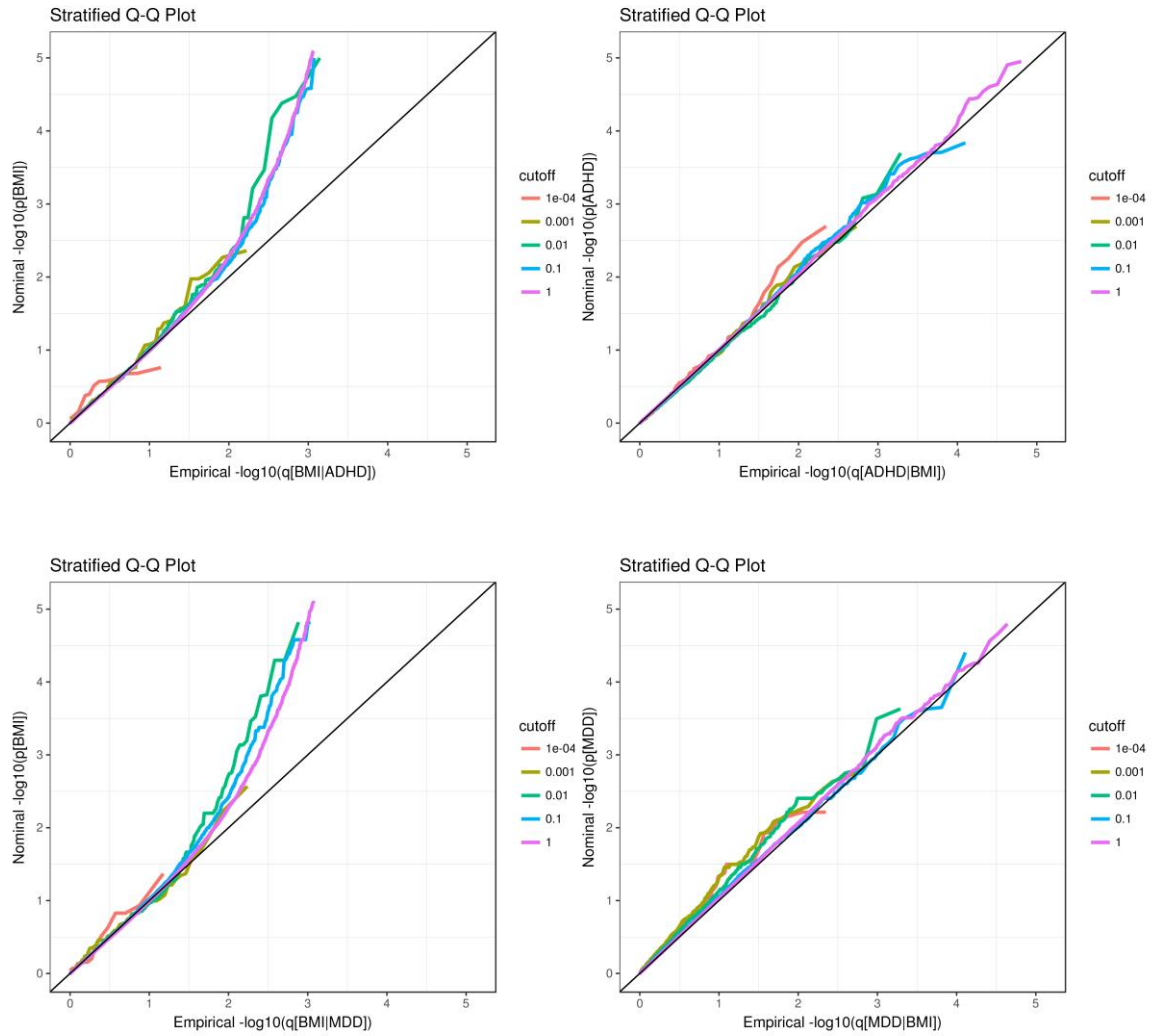

**Figure S1. Stratified QQ plots.** Upper Panel: Stratified QQ plots of nominal versus empirical  $-\log_{10}$  p-values in (left) BMI as a function of significance of the association with ADHD, and in (right) ADHD as a function of significance of the association with BMI. Lower Panel: Stratified QQ plots of nominal versus empirical  $-\log_{10}$  p-values in (left) BMI as a function of significance of the association with MDD, and in (right) MDD as a function of significance of the association with BMI.

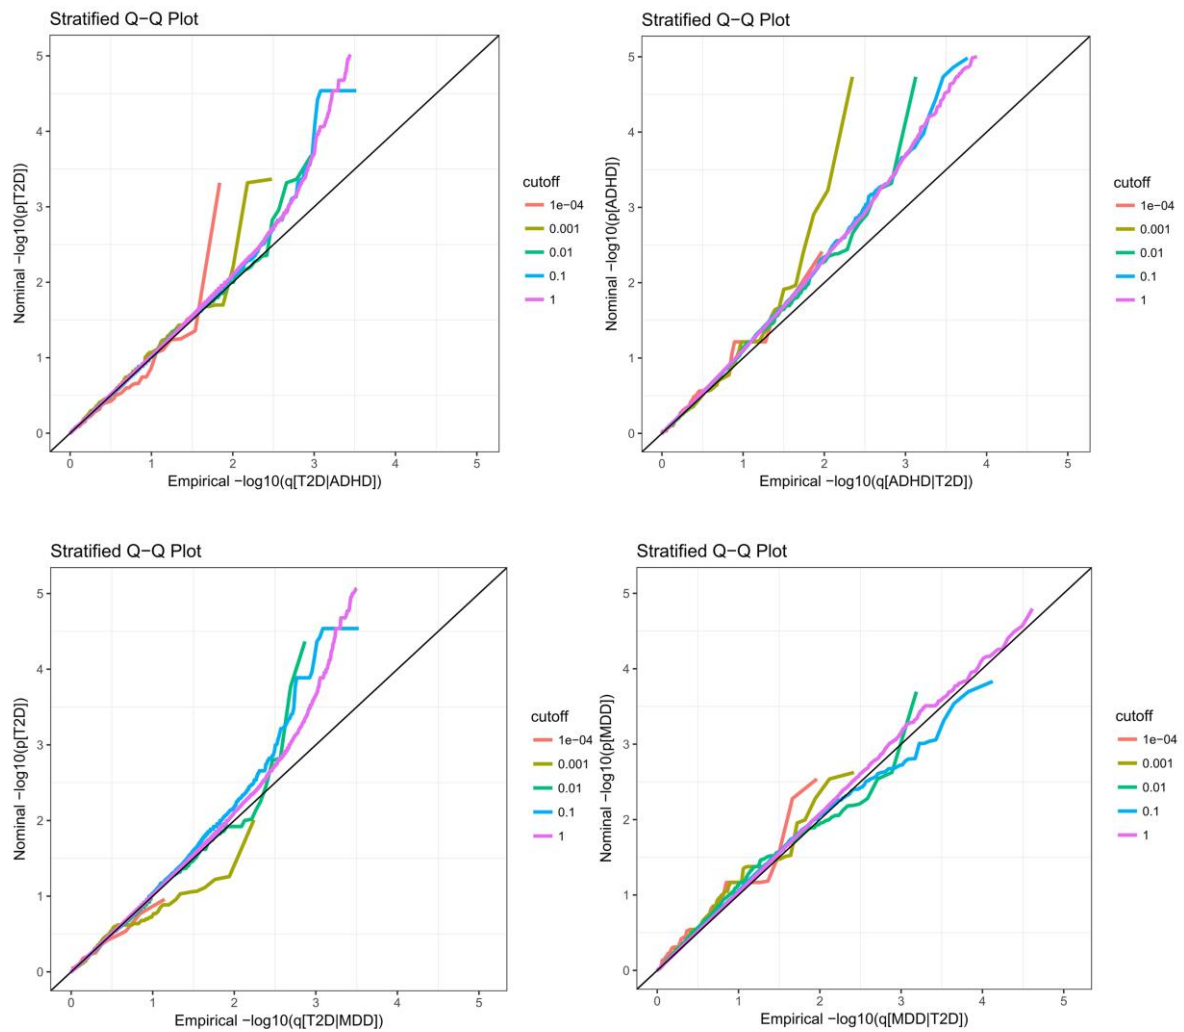

**Figure S2. Stratified QQ plots.** Upper Panel: Stratified QQ plots of nominal versus empirical  $-\log_{10}$  p-values in (left) T2D as a function of significance of the association with ADHD, and in (right) ADHD as a function of significance of the association with T2D. Lower Panel: Stratified QQ plots of nominal versus empirical  $-\log_{10}$  p-values in (left) T2D as a function of significance of the association with MDD, and in (right) MDD as a function of significance of the association with T2D.



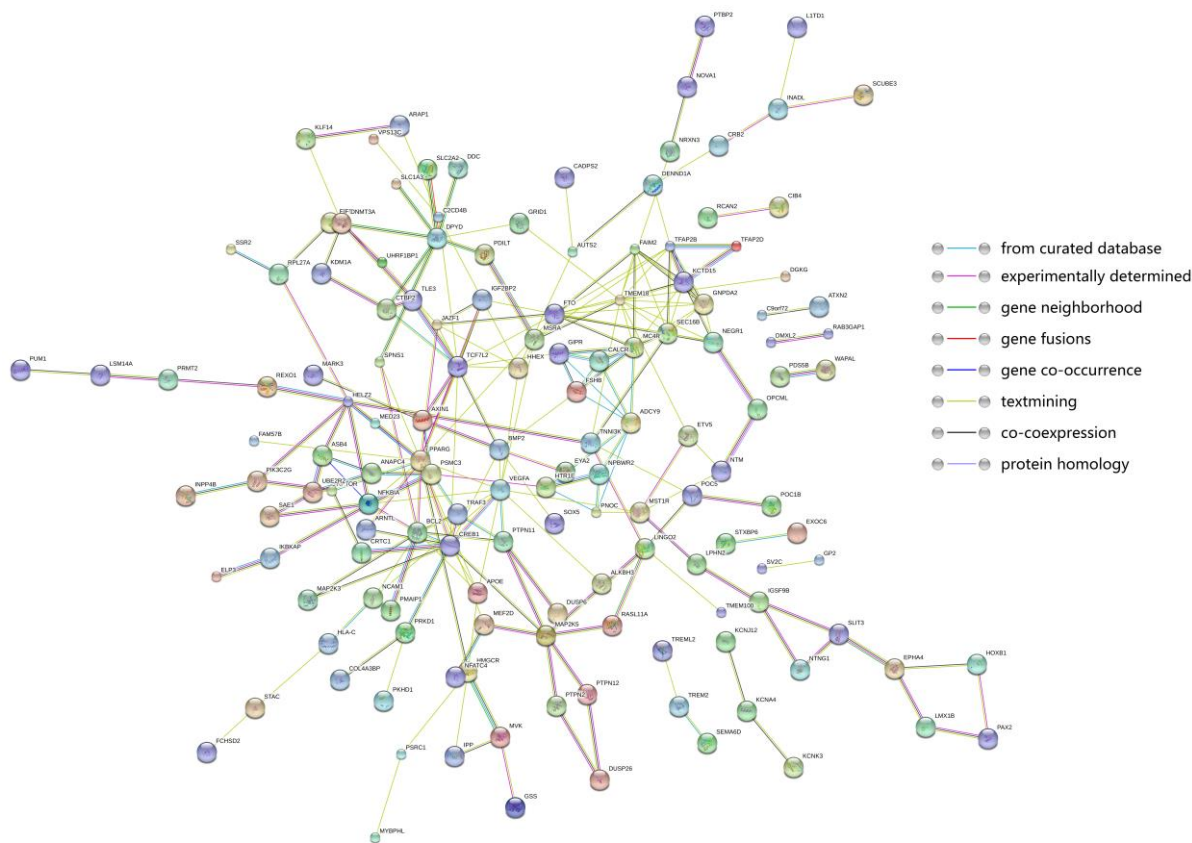

**Figure S3.** Protein-protein interactions between BMI-associated genes.

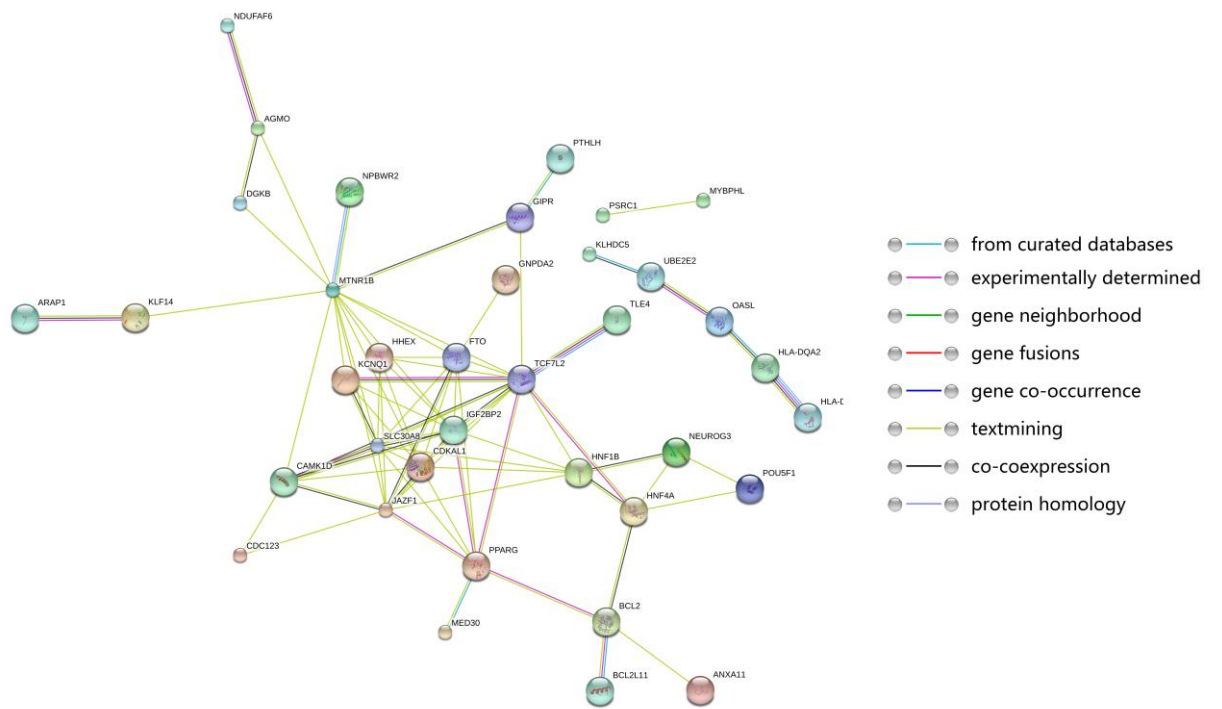

**Figure S4.** Protein-protein interactions between T2D-associated genes.
